# Supplementary material
Source: PubMed Central journal article supplement (PMC1482613)
Supplement: pnas_0602716103_1.pdf [file pnas_0602716103_1.pdf]

**Table 2. Brain regions activated during encoding**

| Brain Region                                                                                                | Direction of effect | Brodmann area | Talairach coordinates |     |     | Volume, mm <sup>3</sup> |
|-------------------------------------------------------------------------------------------------------------|---------------------|---------------|-----------------------|-----|-----|-------------------------|
|                                                                                                             |                     |               | LR                    | PA  | IS  |                         |
| <b>Remembered (R) vs. Forgotten (F) (Fig. 2)</b>                                                            |                     |               |                       |     |     |                         |
| <b>Whole brain (<math>P &lt; 0.05</math> corrected; minimum cluster size = 391 mm<sup>3</sup>)</b>          |                     |               |                       |     |     |                         |
| Left lentiform nucleus                                                                                      | R>F                 |               | -22                   | -1  | -4  | 719                     |
| Right superior frontal gyrus                                                                                | R>F                 | 9             | 37                    | 44  | 31  | 469                     |
| <b>Medial Temporal Lobe (<math>P &lt; 0.05</math> corrected, minimum cluster size = 281 mm<sup>3</sup>)</b> |                     |               |                       |     |     |                         |
| Left hippocampus                                                                                            | R>F                 |               | -31                   | -20 | -9  | 562                     |
| Right perirhinal cortex/amygdala                                                                            | R>F                 | 28,34         | 17                    | -2  | -12 | 297                     |
| <b>Item &amp; Source (I&amp;S) vs. Forgotten (F) (Fig. 3)</b>                                               |                     |               |                       |     |     |                         |
| <b>Whole Brain (<math>P &lt; 0.05</math> corrected; minimum cluster size = 1078 mm<sup>3</sup>)</b>         |                     |               |                       |     |     |                         |
| Left inferior frontal gyrus                                                                                 | I&S>F               | 47            | -28                   | 30  | -4  | 1547                    |
| Right middle frontal gyrus/anterior cingulate                                                               | I&S>F               | 11,24,32      | 20                    | 41  | -8  | 1422                    |
| <b>Medial Temporal Lobe (<math>P &lt; 0.05</math> corrected, minimum cluster size = 656 mm<sup>3</sup>)</b> |                     |               |                       |     |     |                         |
| Left hippocampus                                                                                            | I&S>F               |               | -31                   | -20 | -10 | 1547                    |
| Right parahippocampal cortex/fusiform gyrus                                                                 | I&S>F               | 36,37         | -31                   | -41 | -8  | 891                     |
| Right perirhinal/amygdala                                                                                   | I&S>F               | 28,34         | 29                    | -40 | -12 | 766                     |
| Left parahippocampal cortex/fusiform gyrus                                                                  | I&S>F               | 36,37         | 16                    | -2  | -11 | 734                     |
| Right temporopolar cortex                                                                                   | F>I&S               | 38            | 50                    | 17  | -14 | 1000                    |
| <b>Item Only (IO) vs. Forgotten (F) (fig. 4)</b>                                                            |                     |               |                       |     |     |                         |
| <b>Whole Brain (<math>P &lt; 0.05</math> corrected; minimum cluster size = 391 mm<sup>3</sup>)</b>          |                     |               |                       |     |     |                         |
| Left insula/inferior frontal gyrus                                                                          | IO>F                | 13,47         | -38                   | 21  | -7  | 1141                    |
| Left precentral/middle frontal gyri                                                                         | IO>F                | 6             | -30                   | -6  | 50  | 656                     |
| Left anterior cingulate/medial frontal gyrus                                                                | IO>F                | 6,9,32        | -8                    | 26  | 35  | 484                     |
| Right thalamus                                                                                              | IO>F                |               | 16                    | -15 | 3   | 422                     |
| <b>Medial Temporal Lobe (<math>P &lt; 0.05</math> corrected, minimum cluster size = 281 mm<sup>3</sup>)</b> |                     |               |                       |     |     |                         |
| Right perirhinal cortex/amygdala                                                                            | IO>F                | 28,34         | 17                    | 0   | -10 | 328                     |
| Left hippocampus/perihinal cortex/amygdala                                                                  | IO>F                | 28,34         | -25                   | -8  | -10 | 297                     |
| <b>Item &amp; Source (I&amp;S) (IS) vs. Item Only (IO) (Fig. 5)</b>                                         |                     |               |                       |     |     |                         |
| <b>Whole Brain (<math>P &lt; 0.05</math> corrected; minimum cluster size = 391 mm<sup>3</sup>)</b>          |                     |               |                       |     |     |                         |
| Right insula/superior parietal lobule*                                                                      | I&S>IO              | 13            | 28                    | -39 | 16  | 1719                    |

| Brain Region                                                                                                | Direction of effect | Brodmann area | Talairach coordinates |     |     | Volume, mm <sup>3</sup> |
|-------------------------------------------------------------------------------------------------------------|---------------------|---------------|-----------------------|-----|-----|-------------------------|
|                                                                                                             |                     |               | LR                    | PA  | IS  |                         |
| Right caudate/anterior cingulate gyrus                                                                      | I&S>IO              | 24            | 16                    | 1   | 26  | 938                     |
| Left insula                                                                                                 | I&S>IO              | 13            | -28                   | -26 | 23  | 938                     |
| Left inferior parietal lobule*                                                                              | I&S>IO              |               | -32                   | -46 | 22  | 422                     |
| Right superior frontal gyrus                                                                                | IO>I&S              | 9             | 16                    | 55  | 29  | 953                     |
| Right inferior frontal gyrus                                                                                | IO>I&S              | 13,44,45      | 45                    | 17  | 10  | 750                     |
| Right medial frontal gyrus                                                                                  | IO>I&S              | 6,8           | 7                     | 43  | 39  | 531                     |
| <b>Medial Temporal Lobe (<math>P &lt; 0.05</math> corrected, minimum cluster size = 281 mm<sup>3</sup>)</b> |                     |               |                       |     |     |                         |
| Left entorhinal cortex                                                                                      | I&S>IO              | 34            | -10                   | -7  | -19 | 359                     |

LR (Left/Right), PA (Posterior/Anterior), and IS (Inferior/Superior). Talairach coordinates indicate the center of mass of each cluster. \*Asterisks indicate that, in addition to the brain regions identified in the Talairach atlas, the activity appears to overlie white matter when the activity is superimposed on an image created by the average of all 15 anatomical images.
